# Supplementary material
Source: PubMed Central journal article supplement (PMC3957894)
Supplement: AAC.02075-13_zac003142658so1.pdf [file AAC.02075-13_zac003142658so1.pdf]

# Validation of IMP dehydrogenase inhibitors in a mouse model of cryptosporidiosis

Running Title: *In vivo* antiparasitic activity of CpIMPDH inhibitors

Suresh Kumar Gorla<sup>1</sup>, Nina N. McNair<sup>2</sup>, Guangyi Yang<sup>3</sup>, Song Gao<sup>3</sup>, Ming Hu<sup>3</sup>, Venkatakrisna R. Jala<sup>4</sup>, Bodduluri Haribabu<sup>4</sup>, Boris Striepen<sup>5</sup>, Gregory D. Cuny<sup>3,6</sup>, Jan R. Mead<sup>2</sup> and Lizbeth Hedstrom<sup>1,7</sup> #

## Supporting Material

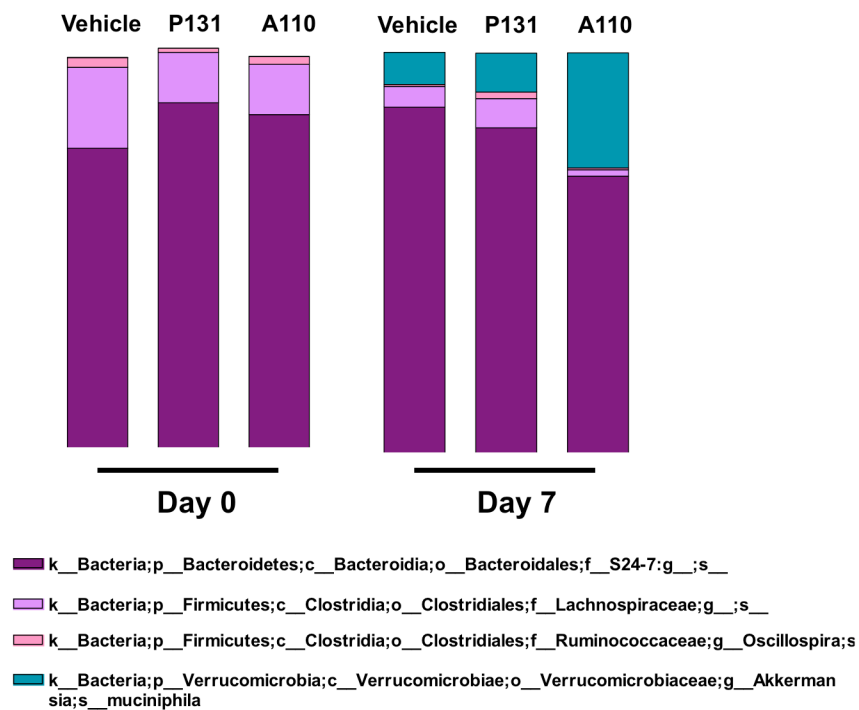

**Figure S1. Effects of A110 and P131 at species level.** A110 and P131 on fecal microbiota at the species level. The cumulative relative distribution of species in different treatments is listed.

**Table S1. In vivo activity of CpIMPDH inhibitors.**

Infection protocol A: IL-12 knockout mice were infected with 1000 oocysts on day 1. Mice were treated daily by oral gavage beginning 4 hours after infection. Feces were collected and counted on day 7 unless otherwise noted. Vehicle = 5% DMSO/corn oil unless otherwise noted.

Infection protocol B: IL-12 knockout mice were infected with 10,000 oocysts on day 1. Mice were treated three times daily by oral gavage beginning 4 hours after infection. Feces were collected and counted on day 4. Vehicle = 5% DMSO/corn oil unless otherwise noted. p values calculated by Mann Whitney nonparametric test using Prism software

| Panel 2A    |              | Oocysts per 100 ul in each mouse |          |            | DPI | Protocol | Notes             |
|-------------|--------------|----------------------------------|----------|------------|-----|----------|-------------------|
| Compound    | Dose (mg/kg) | Veh                              | Prm ctrl | Cmpd       |     |          |                   |
| <b>A110</b> | 250          | 1402                             | 50       | 10722      | 7   | A        | vehicle = 20% PEG |
|             |              | 832                              | 177      | 3647       |     |          |                   |
|             |              | 2015                             | 2029     | 17048      |     |          |                   |
|             |              | 686                              | 1545     | 5395       |     |          |                   |
|             |              | 715                              | 1663     | 22314      |     |          |                   |
|             |              | 1948                             | 1845     | 8806       |     |          |                   |
|             |              | 14582                            | 1122     | 10519      |     |          |                   |
|             |              | 7654                             | 1450     | 7893       |     |          |                   |
|             |              | 2866                             | 1094     | 7387       |     |          |                   |
|             |              | 12528                            |          | 3118       |     |          |                   |
|             |              |                                  |          | <b>p =</b> |     |          |                   |

| Panel 2B    |              | Oocysts per 100 ul in each mouse |          |             | DPI | Protocol | Notes |              |             |  |  |  |
|-------------|--------------|----------------------------------|----------|-------------|-----|----------|-------|--------------|-------------|--|--|--|
| Compound    | Dose (mg/kg) | Veh                              | Prm ctrl | Cmpd        |     |          |       |              |             |  |  |  |
| <b>A110</b> | 100          | 551                              | 488      | 588         | 7   | A        |       |              |             |  |  |  |
|             |              | 2227                             | 87       | 5723        |     |          |       |              |             |  |  |  |
|             |              | 1834                             | 510      | 4012        |     |          |       |              |             |  |  |  |
|             |              | 342                              |          | 7388        |     |          |       |              |             |  |  |  |
|             |              | 582                              |          | 1737        |     |          |       |              |             |  |  |  |
|             |              | 10044                            |          | 165         |     |          |       |              |             |  |  |  |
|             |              | 508                              |          | 2503        |     |          |       |              |             |  |  |  |
|             |              | 1088                             |          | 5067        |     |          |       |              |             |  |  |  |
|             |              |                                  |          | <b>p =</b>  |     |          |       | <b>0.085</b> | <b>0.23</b> |  |  |  |
|             |              | <b>P75</b>                       | 250      | as above    |     |          |       | as above     | 791         |  |  |  |
|             |              |                                  |          |             |     |          |       |              | 1027        |  |  |  |
|             |              |                                  |          | 1040        |     |          |       |              |             |  |  |  |
|             |              |                                  |          | 1141        |     |          |       |              |             |  |  |  |
|             |              |                                  |          | 1956        |     |          |       |              |             |  |  |  |
|             |              |                                  |          | 1752        |     |          |       |              |             |  |  |  |
|             |              |                                  |          | 2072        |     |          |       |              |             |  |  |  |
|             |              |                                  |          | 1965        |     |          |       |              |             |  |  |  |
|             |              | <b>p =</b>                       |          | <b>0.43</b> |     |          |       |              |             |  |  |  |
| <b>P83</b>  | 250          | as above                         | as above | 999         |     |          |       |              |             |  |  |  |
|             |              |                                  |          | 998         |     |          |       |              |             |  |  |  |
|             |              |                                  |          | 1504        |     |          |       |              |             |  |  |  |
|             |              |                                  |          | 1846        |     |          |       |              |             |  |  |  |
|             |              |                                  |          | 859         |     |          |       |              |             |  |  |  |
|             |              |                                  |          | 2915        |     |          |       |              |             |  |  |  |
|             |              |                                  |          | 1809        |     |          |       |              |             |  |  |  |
|             |              |                                  |          | 1346        |     |          |       |              |             |  |  |  |
|             |              | <b>p =</b>                       |          | <b>0.43</b> |     |          |       |              |             |  |  |  |

| Panel 2C |              | Oocysts per 100 ul in each mouse |          |                       |   | DPI | Protocol          | Notes       |
|----------|--------------|----------------------------------|----------|-----------------------|---|-----|-------------------|-------------|
| Compound | Dose (mg/kg) | Veh                              | Prm ctrl | Cmpd                  |   |     |                   |             |
| P25      | 250          | 1486                             | 0        | 1875                  | 6 | A   | Vehicle = 10% PEG |             |
|          |              | 2245                             | 0        | 385                   |   |     |                   |             |
|          |              | 19553                            | 428      | 1334                  |   |     |                   |             |
|          |              | 1802                             | 0        | 9673                  |   |     |                   |             |
|          |              | 23201                            | 150      | 427                   |   |     |                   |             |
|          |              | 10184                            | 0        | 14584                 |   |     |                   |             |
|          |              | 1970                             | 0        | 9441                  |   |     |                   |             |
|          |              | 5020                             | 0        | 12149                 |   |     |                   |             |
|          |              | 19076                            | 0        | 36201                 |   |     |                   |             |
|          |              |                                  |          | 1814                  |   |     |                   |             |
|          |              |                                  |          | <b>p = &lt;0.0001</b> |   |     |                   | <b>0.44</b> |
| P32      | 250          | as above                         | as above | 9374                  | 6 |     | Vehicle = 10% PEG |             |
|          |              |                                  |          | 15620                 |   |     |                   |             |
|          |              |                                  |          | 6757                  |   |     |                   |             |
|          |              |                                  |          | 31614                 |   |     |                   |             |
|          |              |                                  |          | 17015                 |   |     |                   |             |
|          |              |                                  |          | 16684                 |   |     |                   |             |
|          |              |                                  |          | 17552                 |   |     |                   |             |
|          |              |                                  |          | 40947                 |   |     |                   |             |
|          |              |                                  |          | 11170                 |   |     |                   |             |
|          |              |                                  |          | 13859                 |   |     |                   |             |
|          |              |                                  |          | <b>p =</b>            |   |     |                   | <b>0.13</b> |

| Panel 2D |              | Oocysts per 100 ul in each mouse |          |                  |                                                                | DPI | Protocol | Notes        |
|----------|--------------|----------------------------------|----------|------------------|----------------------------------------------------------------|-----|----------|--------------|
| Compound | Dose (mg/kg) | Veh                              | Prm ctrl | Cmpd             |                                                                |     |          |              |
| P82      | 250          | 5039                             | 142      | 1897             | 7                                                              | A   |          |              |
|          |              | 10474                            | 179      | 4255             |                                                                |     |          |              |
|          |              | 6889                             | 176      | 2230             |                                                                |     |          |              |
|          |              | 4406                             |          | 2537             |                                                                |     |          |              |
|          |              | 1546                             |          | 2068             |                                                                |     |          |              |
|          |              | 1696                             |          | 1356             |                                                                |     |          |              |
|          |              | 5476                             |          | 1615             |                                                                |     |          |              |
|          |              | 4923                             |          |                  |                                                                |     |          |              |
|          |              |                                  |          | <b>p = 0.012</b> |                                                                |     |          | <b>0.054</b> |
|          |              |                                  |          | <b>vs Prm</b>    |                                                                |     |          | <b>0.017</b> |
|          |              | P96                              | 250      | as above         |                                                                |     |          | as above     |
|          |              |                                  |          | 408              |                                                                |     |          |              |
|          |              |                                  |          | 1454             |                                                                |     |          |              |
|          |              |                                  |          | 1946             |                                                                |     |          |              |
|          |              |                                  |          | 884              |                                                                |     |          |              |
|          |              |                                  |          | 1174             |                                                                |     |          |              |
|          |              |                                  |          | 2242             |                                                                |     |          |              |
|          |              |                                  |          | 1823             |                                                                |     |          |              |
|          |              |                                  |          | <b>p =</b>       | <b>0.0047</b>                                                  |     |          |              |
|          |              |                                  |          | <b>vs Prm</b>    | <b>0.012</b>                                                   |     |          |              |
|          |              |                                  |          |                  | significantly less than vehicle<br>significantly more than Prm |     |          |              |

| Panel 2E |              | Oocysts per 100 ul in each mouse |          |        |   | DPI | Protocol                        | Notes |
|----------|--------------|----------------------------------|----------|--------|---|-----|---------------------------------|-------|
| Compound | Dose (mg/kg) | Veh                              | Prm ctrl | Cmpd   |   |     |                                 |       |
| P96      | 250          | 993                              | 420      | 1089   | 7 | A   |                                 |       |
|          |              | 1991                             | 128      | 3639   |   |     |                                 |       |
|          |              | 21366                            | 84       | 929    |   |     |                                 |       |
|          |              | 1775                             | 43       | 2443   |   |     |                                 |       |
|          |              | 4716                             | 190      | 1424   |   |     |                                 |       |
|          |              | 2823                             | 35       | 1203   |   |     |                                 |       |
|          |              | 2294                             |          | 1172   |   |     |                                 |       |
|          |              | 1462                             |          | 780    |   |     |                                 |       |
|          |              | 1076                             |          | 294    |   |     |                                 |       |
|          |              | 2305                             |          | 624    |   |     |                                 |       |
|          |              | p =                              | 0.0002   | 0.043  |   |     | significantly less than vehicle |       |
|          |              |                                  | vs Prm   | 0.0005 |   |     | significantly more than Prm     |       |
| P97      | 250          | as above                         | as above | 3600   |   |     |                                 |       |
|          |              |                                  |          | 2151   |   |     |                                 |       |
|          |              |                                  |          | 636    |   |     |                                 |       |
|          |              |                                  |          | 295    |   |     |                                 |       |
|          |              |                                  |          | 2591   |   |     |                                 |       |
|          |              |                                  |          | 663    |   |     |                                 |       |
|          |              |                                  |          | 4492   |   |     |                                 |       |
|          |              |                                  |          | 1225   |   |     |                                 |       |
|          |              |                                  |          | 1069   |   |     |                                 |       |
|          |              |                                  |          | 1679   |   |     |                                 |       |
|          |              | p =                              |          | 0.24   |   |     |                                 |       |

| Panel 2F |              | Oocysts per 100 ul in each mouse |          |       |   | DPI | Protocol                                                                                    | Notes |
|----------|--------------|----------------------------------|----------|-------|---|-----|---------------------------------------------------------------------------------------------|-------|
| Compound | Dose (mg/kg) | Veh                              | Prm ctrl | Cmpd  |   |     |                                                                                             |       |
| P96      | 250          | 1255                             | 52       | 1067  | 7 | A   |                                                                                             |       |
|          |              | 4139                             | 98       | 206   |   |     |                                                                                             |       |
|          |              | 3072                             | 200      | 4884  |   |     |                                                                                             |       |
|          |              | 967                              | 63       | 210   |   |     |                                                                                             |       |
|          |              | 7922                             | 86       | 736   |   |     |                                                                                             |       |
|          |              | 9041                             |          | 11461 |   |     |                                                                                             |       |
|          |              | 567                              |          | 6054  |   |     |                                                                                             |       |
|          |              |                                  |          | 1782  |   |     |                                                                                             |       |
|          |              |                                  |          | 297   |   |     |                                                                                             |       |
|          |              |                                  |          | 3690  |   |     |                                                                                             |       |
|          |              | p =                              | 0.0025   | 0.47  |   |     |                                                                                             |       |
| A119     | 250          |                                  |          | 2122  |   |     | Several mice lost weight on day 4 and looked ruffled day 7. These animals were not sampled. |       |
|          |              |                                  |          | 3191  |   |     |                                                                                             |       |
|          |              |                                  |          | 3206  |   |     |                                                                                             |       |
|          |              |                                  |          | 5107  |   |     |                                                                                             |       |
|          |              |                                  |          | 18006 |   |     |                                                                                             |       |
|          |              |                                  |          | 15259 |   |     |                                                                                             |       |
|          |              | 2887                             |          |       |   |     |                                                                                             |       |
|          |              | p =                              |          | 0.31  |   |     |                                                                                             |       |

| Panel 2G |              | Oocysts per 100 ul in each mouse |          |               |   | DPI | Protocol | Notes        |               |                                                                       |  |  |
|----------|--------------|----------------------------------|----------|---------------|---|-----|----------|--------------|---------------|-----------------------------------------------------------------------|--|--|
| Compound | Dose (mg/kg) | Veh                              | Prm ctrl | Cmpd          |   |     |          |              |               |                                                                       |  |  |
| P131     | 250          | 1778                             | 67       | 1466          | 7 | A   |          |              |               |                                                                       |  |  |
|          |              | 1190                             | 328      | 575           |   |     |          |              |               |                                                                       |  |  |
|          |              | 1807                             | 596      | 373           |   |     |          |              |               |                                                                       |  |  |
|          |              | 5568                             | 580      | 517           |   |     |          |              |               |                                                                       |  |  |
|          |              | 3048                             |          | 16990         |   |     |          |              |               |                                                                       |  |  |
|          |              | 2360                             |          | 1060          |   |     |          |              |               |                                                                       |  |  |
|          |              | 2203                             |          | 1776          |   |     |          |              |               |                                                                       |  |  |
|          |              | 2948                             |          | 411           |   |     |          |              |               |                                                                       |  |  |
|          |              | 2672                             |          | 1346          |   |     |          |              |               |                                                                       |  |  |
|          |              | 1927                             |          | 88            |   |     |          |              |               |                                                                       |  |  |
|          |              |                                  |          | <b>p =</b>    |   |     |          | <b>0.002</b> | <b>0.0039</b> |                                                                       |  |  |
|          |              |                                  |          | <b>vs Prm</b> |   |     |          |              | <b>0.22</b>   | significantly less than vehicle<br>no significant difference with Prm |  |  |

| Panel 5A |              | Oocysts per 100 ul in each mouse |          |               |   | DPI | Protocol | Notes         |                   |                                                                |  |  |
|----------|--------------|----------------------------------|----------|---------------|---|-----|----------|---------------|-------------------|----------------------------------------------------------------|--|--|
| Compound | Dose (mg/kg) | Veh                              | Prm ctrl | Cmpd          |   |     |          |               |                   |                                                                |  |  |
| P131     | 3 x 83       | 360                              | 123      | 47            | 4 | B   |          |               |                   |                                                                |  |  |
|          |              | 737                              | 22       | 0             |   |     |          |               |                   |                                                                |  |  |
|          |              | 3288                             | 22       | 15            |   |     |          |               |                   |                                                                |  |  |
|          |              | 143                              | 90       | 24            |   |     |          |               |                   |                                                                |  |  |
|          |              | 459                              | 132      | 0             |   |     |          |               |                   |                                                                |  |  |
|          |              | 239                              | 33       | 0             |   |     |          |               |                   |                                                                |  |  |
|          |              | 269                              |          | 14            |   |     |          |               |                   |                                                                |  |  |
|          |              | 230                              |          | 63            |   |     |          |               |                   |                                                                |  |  |
|          |              | 194                              |          | 23            |   |     |          |               |                   |                                                                |  |  |
|          |              | 61                               |          |               |   |     |          |               |                   |                                                                |  |  |
|          |              |                                  |          | <b>p =</b>    |   |     |          | <b>0.0017</b> | <b>&lt;0.0001</b> |                                                                |  |  |
|          |              |                                  |          | <b>vs Prm</b> |   |     |          |               | <b>0.045</b>      | significantly less than vehicle<br>significantly less than Prm |  |  |

| Panel 5B |              | Oocysts per 100 ul in each mouse |          |              |                                                                | DPI | Protocol | Notes         |
|----------|--------------|----------------------------------|----------|--------------|----------------------------------------------------------------|-----|----------|---------------|
| Compound | Dose (mg/kg) | Veh                              | Prm ctrl | Cmpd         |                                                                |     |          |               |
| P131     | 3 x 83       | 1690                             | 52       | 0            | 4                                                              | B   |          |               |
|          |              | 917                              | 82       | 0            |                                                                |     |          |               |
|          |              | 1411                             | 65       | 0            |                                                                |     |          |               |
|          |              | 9900                             | 45       | 0            |                                                                |     |          |               |
|          |              | 2393                             | 289      | 0            |                                                                |     |          |               |
|          |              | 1814                             |          | 22           |                                                                |     |          |               |
|          |              | 804                              |          | 0            |                                                                |     |          |               |
|          |              | 1056                             |          | 78           |                                                                |     |          |               |
|          |              | 735                              |          | 35           |                                                                |     |          |               |
|          |              | 2179                             |          | 103          |                                                                |     |          |               |
|          |              | 973                              |          |              |                                                                |     |          |               |
|          |              |                                  |          | <b>p =</b>   |                                                                |     |          | <b>0.0005</b> |
|          |              | <b>vs Prm</b>                    |          | <b>0.024</b> | significantly less than vehicle<br>significantly less than Prm |     |          |               |

**Table S2. Compound-dependent parameters in UPLC-MS analysis.** UPLC conditions for analyzing the test compounds were: system, Waters Acquity™ with diode array detector (DAD); column, BEH C<sub>18</sub> column (50 × 2.1mm I.D., 1.7 μm, Waters, Milford, MA, USA); mobile phase A (MPA), 0.1% formic acid in water; mobile phase B (MPB), 100% acetonitrile; gradient for positive scan method, 0- 0.5 min, 5 % MPB, 0.5-1.0 min, 5-50 % MPB, 1.0-2.0 min, 50-95 % MPB, 2.0-2.5 min, 95 % MPB, 2.5 – 2.6 min, 95-5 % MPB, 2.6 - 3.0 min, 5% MPB; gradient for negative scan method, 0- 0.5 min, 5 % MPB, 0.5-3.0 min, 5-50 % MPB, 3.0-4.0 min, 50-95 % MPB, 4.0-4.5 min, 95 % MPB, 4.5 – 4.6 min, 95-5 % MPB, 4.6 - 5.0 min, 5% MPB; flow rate, 0.55 ml/min; column temperature, 60 °C; injection volume, 10μL. Formononetin was used as the internal standard.

The MS analysis was performed on an API 3200 Qtrap triple quadrupole mass spectrometer (Applied Biosystem/ MDS SCIEX, Foster City, CA, USA) equipped with a TurbolonSpray™ source. The concentrations of tested compounds were determined by using MRM (Multiple Reaction Monitoring) scan type in positive mode. The instrument dependent parameters for mass spectrum were set as follows: ionspray voltage, 5.5 kV; ion source temperature, 400 °C; nebulizer gas (gas 1), nitrogen, 40 psi; turbo gas (gas 2), nitrogen 40 psi; curtain gas, nitrogen 30 psi. Unit mass resolution was set in both mass-resolving quadruples Q1 and Q3. Compound-dependent parameters are listed.

| Compound          | Scan Mode | Q1(m/z) | Q3(m/z) | Dwell time (ms) | DP (V) | CEP(V) | CE(V) | CXP(V) |
|-------------------|-----------|---------|---------|-----------------|--------|--------|-------|--------|
| <b>P131</b>       | Positive  | 434     | 158     | 100             | 48     | 22     | 37    | 3      |
| <b>A110</b>       |           | 368.3   | 162.2   | 100             | 44     | 20     | 22    | 4      |
| <b>A119</b>       |           | 368.1   | 195.2   | 100             | 20     | 30     | 20    | 5      |
| <b>P96</b>        |           | 405.4   | 190.2   | 100             | 70     | 22     | 30    | 6      |
| Formononetin (IS) |           | 269     | 197     | 100             | 67     | 17     | 49    | 3      |
| <b>P25</b>        | Negative  | 372     | 169     | 100             | -51    | -24    | -17   | -4     |
| <b>P32</b>        |           | 387     | 169     | 100             | -58    | -24    | -23   | -4     |
| <b>P82</b>        |           | 412     | 217     | 100             | -50    | -21    | -18   | -5     |
| <b>P83</b>        |           | 426     | 194     | 100             | -53    | -26    | -20   | -8     |
| Formononetin (IS) |           | 267     | 152     | 100             | -40    | -30    | -23   | -3     |
